# Supplementary material for: Rapid Molecular Diagnosis of Genetically Inherited Neuromuscular Disorders Using Next-Generation Sequencing Technologies
Source: MDPI journal article supplement (doi:10.3390/jcm11102750), 2022-05-12
Supplement: s1 [file s1]

**Supplementary Table S1.** Clinical data and genetic findings for each patient for which a positive diagnosis was established using the INMD panel. Recurrent variants identified in our cohort are highlighted in bold.

|                                   | Patient ID | Age (years) | Sex | HPO                                                                                                     | Variants                               | GnomAD                | Family study   | Phenomizer p-value | Gene         | Disorder MIM                                                        | Inheritance |
|-----------------------------------|------------|-------------|-----|---------------------------------------------------------------------------------------------------------|----------------------------------------|-----------------------|----------------|--------------------|--------------|---------------------------------------------------------------------|-------------|
| Muscular dystrophies / Myopathies | 1          | 56          | F   | Limb-girdle muscular dystrophy<br>Myopathy<br>Distal/proximal muscle weakness                           | c.580A>T                               | -                     | <i>De novo</i> | 0.0080             | <i>ACTA1</i> | Nemaline myopathy<br># 161800                                       | AD /AR      |
|                                   | 2          | 8           | F   | Nemaline bodies<br>Muscle weakness, proximal and distal<br>Muscle weakness, upper and lower limbs       | c.529A>G/<br>c.809-2A>T                | -/<br>0.0000041       | Carriers       | 0.0006             |              |                                                                     |             |
|                                   | 3          | 43          | M   | Elevated serum creatine kinase<br>Muscle weakness<br>Muscular hypotonia                                 | c.133G>T/<br>c.242C>T/<br>c.1029A>T    | -/-                   | Carriers       | 0.2616             | <i>AMPD1</i> | Myopathy due to<br>myoadenylate deaminase<br>deficiency<br># 615511 | AR          |
|                                   | 4          | 44          | M   | Myopathy<br>Exercise intolerance<br>Restless leg<br>Myalgia<br>Dyslipidemia                             | <b>c.191dup/</b><br><b>c.191dup</b>    | 0.0011/<br>0.0011     | Carriers       | 0.1776             | <i>ANO5</i>  | Muscular dystrophy<br># 611307                                      | AD /AR      |
|                                   | 5          | 53          | M   | Limb-girdle muscular dystrophy                                                                          | <b>c.191dup/</b><br><b>c.191dup</b>    | 0.0011/<br>0.0011     | Carriers       | 0.3181             |              |                                                                     |             |
|                                   | 6          | 26          | F   | Myopathy<br>Elevated serum creatine phosphokinase<br>Distal muscle weakness<br>Proximal muscle weakness | <b>c.191dup/</b><br><b>c.692G&gt;T</b> | 0.0011/<br>0.00103    | Carriers       | 0.0038             |              |                                                                     |             |
|                                   | 7          | 52          | F   | Myotonia<br>Elevated serum creatine phosphokinase<br>Muscle weakness                                    | c.1119+1G>T/<br>c.1119+1G>T            | 0.000008/<br>0.000008 | Carriers       | 0.2175             |              |                                                                     |             |
|                                   | 8          | 62          | M   | Myalgia<br>Elevated serum creatine phosphokinase<br>Reduced muscle fiber dysferlin                      | c.206_207del/<br>c.206_207del          | 0.000004/<br>0.000004 | Carriers       | 0.0607             |              |                                                                     |             |

|                                   | Patient ID | Age<br>(years) | Sex | HPO                                                                                           | Variants                                 | GnomAD                | Family study           | Phenomizer<br>p-value | Gene    | Disorder<br>MIM                                                                         | Inheritance |
|-----------------------------------|------------|----------------|-----|-----------------------------------------------------------------------------------------------|------------------------------------------|-----------------------|------------------------|-----------------------|---------|-----------------------------------------------------------------------------------------|-------------|
| Muscular dystrophies / Myopathies | 9          | 41             | M   | Muscular dystrophy<br>Elevated serum creatine<br>phosphokinase                                | c.1982T>C<br>c.1982T>C                   | 0.000007/<br>0.000007 | Carriers               | 0.0469                | ANO5    | Muscular dystrophy<br># 611307                                                          | AR          |
|                                   | 11         | 59             | F   | Muscular dystrophy                                                                            | c.2361_2362insTCAT<br>c.505C>T           | -/<br>0.000004        | Carriers               | 0.6363                | CAPN3   | Muscular dystrophy,<br>limb-girdle<br># 618129                                          | AD /AR      |
|                                   | 12         | 58             | M   | Limb-girdle muscular<br>dystrophy                                                             | c.2361_2362insTCAT<br>c.2361_2362insTCAT | -/-                   | Carriers               | 0.4524                |         |                                                                                         |             |
|                                   | 13         | 20             | M   | Muscular dystrophy                                                                            | c.1962delC<br>c.2120A>G                  | -/<br>0.000151        | Carriers               | 0.6363                |         |                                                                                         |             |
|                                   | 14         | 31             | F   | Myopathy<br>Global systolic dysfunction                                                       | c.701C>T<br>c.701C>T                     | 0.000016/<br>0.000016 | Carriers               | 0.8865                | CHKB    | Muscular dystrophy<br># 602541                                                          | AR          |
|                                   | 15         | -              | M   | Muscle weakness                                                                               | c.8215T>C<br>c.6995G>A                   | 0.0000080/<br>-       | Carriers               | 0.7080                | COL12A1 | Bethlem myopathy<br># 616471                                                            | AR          |
|                                   | 16         | 3              | F   | Muscle weakness<br>Joint contracture<br>Lobulated muscle fibers<br>Reduced muscle collagen VI | c.868G>A                                 | -                     | De novo                | 0.0358                | COL6A1  | Ullrich congenital<br>muscular dystrophy<br>#254090                                     | AD /AR      |
|                                   | 17         | 47             | M   | Reduced muscle collagen VI<br>Myopathy                                                        | c.739-2A>G                               | -                     | De novo                | 0.0761                |         | Bethlem myopathy<br># 158810                                                            |             |
|                                   | 18         | 10             | M   | Myopathy                                                                                      | c.1806C>A                                | -                     | Paternal<br>(affected) | 0.0020                | COL6A2  | Ullrich congenital<br>muscular dystrophy<br>#254090<br><br>Bethlem myopathy<br># 158810 | AD /AR      |
|                                   | 19         | 21             | M   | Nonprogressive muscular<br>atrophy<br>Elevated serum creatine<br>phosphokinase<br>Myopathy    | c.1806C>A<br>c.2891T>C                   | -/<br>0.00000407      | Carriers               | 0.0803                | COL6A2  | Ullrich congenital<br>muscular dystrophy<br>#254090                                     | AD /AR      |
|                                   | 20         | 8              | F   | Limb-girdle muscular<br>dystrophy                                                             | c.875G>A                                 | -                     | De novo                | 0.0616                |         | Bethlem myopathy<br># 158810                                                            |             |
|                                   | 21         | 59             | F   | Limb-girdle muscle weakness                                                                   | c.6320_6322del                           | -                     | Affected<br>brothers   | 0.4861                | COL6A3  | Ullrich congenital<br>muscular dystrophy<br>#254090<br><br>Bethlem myopathy<br># 158810 | AD /AR      |

|                                   | Patient ID | Age (years) | Sex | HPO                                                                                       | Variants                       | GnomAD                    | Family study          | Phenomizer p-value | Gene   | Disorder MIM                                   | Inheritance |  |
|-----------------------------------|------------|-------------|-----|-------------------------------------------------------------------------------------------|--------------------------------|---------------------------|-----------------------|--------------------|--------|------------------------------------------------|-------------|--|
| Muscular dystrophies / Myopathies | 22         | 42          | M   | Elevated serum creatine phosphokinase<br>Exercise intolerance<br>Muscular dystrophy       | c.1688A>G<br>c.1688A>G         | 0.00216/<br>0.00216       | Carriers              | 0.2116             | COL6A3 | Ullrich congenital muscular dystrophy #254090  | AD /AR      |  |
|                                   | 23         | 39          | M   | Myopathy<br>Rhabdomyolysis<br>Elevated serum transaminases                                | c.1631G>A                      | 0.00000398                | De novo               | 0.2687             |        | Bethlem myopathy # 158810                      |             |  |
|                                   | 24         | 57          | M   | Distal muscle weakness<br>Elevated serum creatine phosphokinase                           | c.7525C>T                      | -                         | Maternal (Unaffected) | 0.1941             |        |                                                |             |  |
|                                   | 25         | 11          | M   | Myopathy                                                                                  | c.9622A>G                      | -                         | Maternal (Unaffected) | 0.9065             | DMD    |                                                | X-linked    |  |
|                                   | 26         | 14          | M   | EMG: myotonic discharges<br>Muscular dystrophy                                            | c.9563+1G>A                    | -                         | Maternal (Unaffected) | 0.1485             |        |                                                |             |  |
|                                   | 27         | 16          | F   | Elevated serum creatine phosphokinase<br>EMG: myopathic abnormalities                     | c.5697dupA                     | -                         | De novo               | 0.1986             |        | Duchenne muscular dystrophy # 310200           |             |  |
|                                   | 28         | 1           | F   | Elevated serum creatine phosphokinase<br>Seizures<br>Hypoglycemia<br>Feeding difficulties | c.3125delA                     | -                         | De novo               | 0.6050             |        |                                                |             |  |
|                                   | 29         | 3           | M   | Elevated serum creatine phosphokinase<br>Elevated hepatic transaminases                   | g.(?_32430456)_(32486604_?)dup | -                         | Maternal (Unaffected) | 0.8279             |        |                                                |             |  |
|                                   | 30         | 9           | M   | Elevated serum creatine phosphokinase<br>Elevated hepatic transaminases                   | g.(?_32404402)_(32503241_?)del | -                         | Maternal (Unaffected) | 0.8279             |        |                                                |             |  |
|                                   | 31         | 71          | M   | Muscular dystrophy                                                                        | c.5429G>A<br>c.5429G>A         | -                         | Carriers              | 0.3200             | DYSF   | Miyoshi muscular dystrophy # 254130            | AR          |  |
|                                   | 32         | 3           | F   | Elevated serum creatine phosphokinase<br>Elevated aldolase level<br>Myopathy              | c.545A>G<br>c.898G>A           | 0.000082/<br>0.0000322    | Carriers              | 0.0525             | FKRP   | Muscular dystrophy-dystroglycanopathy # 606612 | AR          |  |
|                                   | 33         | -           | F   | Myopathy<br>Muscle weakness<br>Increased muscle glycogen content                          | c.46G>C<br>c.46G>C             | 0.00000398/<br>0.00000398 | Carriers              | 0.0264             | GYG1   | Glycogen storage disease XV #613507            | AR          |  |

|                                   | Patient ID | Age (years) | Sex | HPO                                                                                                                                                    | Variants                | GnomAD              | Family study             | Phenomizer p-value | Gene  | Disorder MIM                                          | Inheritance |
|-----------------------------------|------------|-------------|-----|--------------------------------------------------------------------------------------------------------------------------------------------------------|-------------------------|---------------------|--------------------------|--------------------|-------|-------------------------------------------------------|-------------|
| Muscular dystrophies / Myopathies | 34         | 16          | M   | Dandy-Walker malformation<br>Hydrocephalus<br>Muscular dystrophy                                                                                       | c.149C>T<br>c.8075+1G>A | 0.0000398/<br>-     | Carriers                 | 0.2056             | LAMA2 | Muscular dystrophy,<br>limb-girdle<br># 618138        | AR          |
|                                   | 35         | 3           | M   | Myopathy<br>Cardiomyopathy                                                                                                                             | c.1606G>A               | -                   | De novo                  | 0.3835             | MYH7  | Distal myopathy<br># 160500                           |             |
|                                   | 36         | 23          | M   | Abnormal muscle glycogen content<br>Muscle weakness                                                                                                    | c.1820C>T<br>c.1820C>T  | -/-                 | Carriers                 | 0.2350             | PFKM  | Glycogen storage<br>disease VII<br># 232800           | AR          |
|                                   | 37         | 62          | F   | Myalgia<br>Elevated serum creatine<br>phosphokinase                                                                                                    | c.2230-1G>T             | -                   | De novo                  | 0.0988             | PHKA1 | Muscle glycogenosis<br># 300559                       | X-linked    |
|                                   | 38         | 51          | M   | Elevated serum creatine<br>phosphokinase                                                                                                               | c.784G>A                | -                   | Maternal<br>(unaffected) | 0.6922             |       |                                                       |             |
|                                   | 39         | 52          | F   | Progressive muscle weakness<br>Pelvic girdle muscle weakness                                                                                           | c.406T>C<br>c.406T>C    | -/-                 | Carriers                 | 0.1287             | POMT2 | Muscular dystrophy-<br>dystroglycanopathy<br># 613158 | AR          |
|                                   | 40         | 21          | M   | Limb-girdle muscular dystrophy<br>Paranoia<br>Psychotic episodes<br>Joint pain<br>Gait disturbance<br>Scoliosis<br>Synovitis<br>Iron deficiency anemia | c.660G>A<br>c.660G>A    | 0.00209/<br>0.00209 | Carriers                 | 1.0000             | PYGM  | McArdle disease<br># 232600                           | AR          |
|                                   | 41         | 15          | F   | Myopathy                                                                                                                                               | c.10347+1G>A            | 0.000004            | -                        | 0.7174             | RYR1  | Central core disease<br># 117000                      | AD /AR      |
|                                   | 42         | 1           | M   | Myopathy                                                                                                                                               | c.4837C>T<br>c.7027G>A  | 0/<br>0.0000239     | Carriers                 | 0.7174             |       |                                                       |             |
|                                   | 43         | 69          | M   | Limb-girdle muscular dystrophy                                                                                                                         | c.917C>T                | 0.0000159           | De novo                  | 0.4524             |       |                                                       |             |
|                                   | 44         | 37          | M   | Myopathy<br>Elevated serum creatine<br>phosphokinase                                                                                                   | c.176C>T/<br>c.6856C>G  | -/-                 | Maternal<br>(affected)   | 0.1393             |       |                                                       |             |
|                                   | 45         | 4           | M   | Myopathic facies<br>Unilateral ptosis<br>Muscle weakness<br>Motor delay                                                                                | c.2709C>G               | 0.00000795          | Father<br>(unaffected)   | 0.0761             |       |                                                       |             |

|                                   | Patient ID | Age (years) | Sex | HPO                                                                                                                                         | Variants                     | GnomAD                    | Family study | Phenomizer p-value | Gene  | Disorder MIM                                  | Inheritance |
|-----------------------------------|------------|-------------|-----|---------------------------------------------------------------------------------------------------------------------------------------------|------------------------------|---------------------------|--------------|--------------------|-------|-----------------------------------------------|-------------|
| Muscular dystrophies / Myopathies | 46         | 50          | M   | Paresthesia<br>Peripheral axonal neuropathy                                                                                                 | c.7261G>T                    | 0.0000318                 | -            | 0.2984             | RYR1  | Central core disease<br># 117000              | AD /AR      |
|                                   | 47         | 48          | M   | Elevated serum creatine phosphokinase<br>Rhabdomyolysis<br>Myalgia<br>Proximal muscle weakness                                              | c.12836C>T                   | 0.0000171                 | De novo      | 0.0059             |       |                                               |             |
|                                   | 48         | 6           | F   | Elevated serum creatine phosphokinase<br>Elevated hepatic transaminases<br>Marked muscular hypertrophy<br>Fatigue<br>Abnormal urinary color | c.724G>T<br>c.739G>A         | 0.00000398/<br>0.000112   | Carriers     | 0.3651             | SGCA  | Muscular dystrophy, limb-girdle<br># 608099   | AR          |
|                                   | 49         | 10          | F   | Muscle weakness                                                                                                                             | c.739G>A<br>c.850C>T         | 0.000112/<br>0.000151     | Carriers     | 0.7080             |       |                                               |             |
|                                   | 50         | 12          | F   | Limb-girdle muscular dystrophy<br>Elevated serum creatine phosphokinase                                                                     | c.848G>A<br>c.848G>A         | 0.00000398/<br>0.00000398 | Carriers     | 0.0699             | SGCG  | Muscular dystrophy, limb-girdle<br># 253700   | AR          |
|                                   | 51         | 2           | F   | Rhabdomyolysis<br>Elevated serum creatine phosphokinase                                                                                     | c.525delT<br>c.525delT       | 0.0000557/<br>0.0000557   | Carriers     | 0.5727             |       |                                               |             |
|                                   | 52         | 18          | F   | Axial hypotonia<br>Muscle weakness                                                                                                          | c.26095-1G>T<br>c.26095-1G>T | -/-                       | Carriers     | 0.4314             | SYNE1 | Emery-Dreifuss muscular dystrophy<br># 612998 | AR          |
|                                   | 53         | 3           | M   | Neutropenia<br>Short stature<br>Truncal obesity<br>Lactic acidosis<br>Proximal muscle weakness                                              | c.527A>G                     | -                         | De novo      | 0.3639             | TAZ   | Barth syndrome<br># 302060                    | X-linked    |
|                                   | 54         | 28          | M   | Progressive muscle weakness<br>Knee flexion contracture<br>Achilles tendon contracture<br>Reduced muscle collagen VI                        | c.255C>A<br>c.255C>A         | -/-                       | Carriers     | 0.0222             | TCAP  | Muscular dystrophy, limb-girdle<br>#601954    | AR          |

|                                   | Patient ID | Age (years) | Sex | HPO                                                                                                          | Variants                                               | GnomAD                    | Family study        | Phenomizer p-value | Gene | Disorder MIM                                                          | Inheritance |
|-----------------------------------|------------|-------------|-----|--------------------------------------------------------------------------------------------------------------|--------------------------------------------------------|---------------------------|---------------------|--------------------|------|-----------------------------------------------------------------------|-------------|
| Muscular dystrophies / Myopathies | 55         | 51          | F   | Myopathy<br>Muscle Weakness<br>Myalgia<br>Skeletal muscle fatty infiltration                                 | c.269G>A                                               | -                         | Maternal (affected) | 0.0217             | TPM2 | Nemaline myopathy # 609285                                            | AD          |
|                                   | 56         | 11          | M   | Myopathy                                                                                                     | c.12411delT<br>c.105110_105111delCC                    | -/-                       | Carriers            | 0.6163             | TTN  | Muscular dystrophy, limb-girdle #608807<br><br>Salih myopathy #611705 | AD /AR      |
|                                   | 57         | 2           | M   | Arthrogryposis multiplex congenital<br>Amyoplasia<br>Severe muscular hypotonia<br>Global developmental delay | c.38661_38665del<br>c.38661_38665del                   | -/-                       | Maternal Isodisomy  | 0.1041             |      |                                                                       |             |
|                                   | 58         | 21          | M   | Muscular dystrophy<br>Arthrogryposis multiplex congenita                                                     | c.38661_38665del<br>c.38661_38665del                   | -/-                       | Carriers            | 0.1027             |      |                                                                       |             |
|                                   | 59         | 3           | M   | Myopathy                                                                                                     | c.3034C>T<br>c.106531+1G>A                             | 0.00000399/<br>0.00000447 | Carriers            | 0.6163             |      |                                                                       |             |
|                                   | 60         | 3           | F   | Myopathy                                                                                                     | c.33064C>T<br>c.102941G>A                              | 0.00000402/<br>-          | Carriers            | 0.6163             |      |                                                                       |             |
|                                   | 61         | 36          | M   | Limb-girdle muscular dystrophy                                                                               | c.102966del<br>c.102966del                             | 0.00000401/<br>0.00000401 | Carriers            | 0.1648             |      |                                                                       |             |
|                                   | 62         | 12          | F   | Muscular dystrophy<br>Reduced muscle collagen VI                                                             | c.38737G>T<br>c.87019_87022del                         | 0.0000081/<br>-           | Carriers            | 0.0160             |      |                                                                       |             |
|                                   | 63         | 22          | F   | Myopathy                                                                                                     | c.86992_86994delCTG<br>insGTCTGTCAT<br>c.101608 + 1G>A | -/<br>0.00000447          | Carriers            | 0.6163             |      |                                                                       |             |

|                          | Patient ID | Age (years) | Sex | HPO                                                   | Variants                       | GnomAD              | Family study        | Phenomizer p-value | Gene           | Disorder MIM                                 | Inheritance |
|--------------------------|------------|-------------|-----|-------------------------------------------------------|--------------------------------|---------------------|---------------------|--------------------|----------------|----------------------------------------------|-------------|
| Peripheral Nerve Disease | 64         | 0,66        | F   | Poor head control<br>Hypotonia                        | c.1856C>T                      | -                   | <i>De novo</i>      | 0.4985             | <i>DNM2</i>    | Charcot-Marie-Tooth disease # 606482         | AD /AR      |
|                          | 65         | 29          | F   | Progressive muscle weakness<br>Distal muscle weakness | c.628C>G                       | -                   | <i>De novo</i>      | 0.1225             | <i>DYNC1H1</i> | Charcot-Marie-Tooth disease, axonal # 614228 | AD          |
|                          | 66         | 19          | M   | Frequent falls<br>Sensorimotor polyneuropathy         | c.547C>T                       | -                   | X-linked            | 0.2284             | <i>GJB1</i>    | Charcot-Marie-Tooth disease # 302800         | X-linked    |
|                          | 67         | 15          | M   | Sensorimotor polyneuropathy                           | c.110G>C<br>c.110G>C           | 0.00026/<br>0.00026 | Carriers            | 0.7919             | <i>HINT1</i>   | Neuromyotonia and axonal neuropathy # 137200 | AR          |
|                          | 68         | 16          | F   | Acute demyelinating polyneuropathy                    | c.181G>A<br>c.1327C>T          | -/<br>0.0000121     | Carriers            | 0.4708             | <i>IGHMBP2</i> | Charcot-Marie-Tooth disease # 616155         | AR          |
|                          | 69         | 1           | M   | Joint hypermobility<br>Hypotonia                      | c.1580_1581insC                | 0.0000216           | Paternal (affected) | 1.0000             | <i>INF2</i>    | Charcot-Marie-Tooth disease # 614455         | AD          |
|                          | 70         | 5           | F   | Muscular dystrophy                                    | c.326A>G                       | -                   | <i>De novo</i>      | 1.0000             | <i>MFN2</i>    | Charcot-Marie-Tooth disease # 609260         | AD /AR      |
|                          | 71         | 49          | M   | Muscular dystrophy                                    | c.1666C<br>c.1972G>A           | -/-                 | Carriers            | -                  | <i>MME</i>     | Charcot-Marie-Tooth disease # 617017         | AR          |
|                          | 72         | 64          | F   | Congenital peripheral neuropathy                      | g.(?_15134208)_(15142953_?)dup | -                   | <i>De novo</i>      | 0.7919             | <i>PMP22</i>   | Charcot-Marie-Tooth disease # 118220         | AD          |
|                          | 73         | 62          | M   | EMG abnormalities                                     | g.(?_15164065)_(15903230_?)dup | -                   | -                   | 1.0000             |                |                                              |             |

|                                                         | Patient ID | Age (years) | Sex | HPO                                                                                  | Variants                                   | GnomAD                  | Family study        | Phenomizer p-value | Gene   | Disorder MIM                                                    | Inheritance |
|---------------------------------------------------------|------------|-------------|-----|--------------------------------------------------------------------------------------|--------------------------------------------|-------------------------|---------------------|--------------------|--------|-----------------------------------------------------------------|-------------|
| Peripheral Nerve Disease                                | 74         | 74          | F   | Polyneuropathy<br>Gait disturbance<br>Dysphagia<br>Dysphonia                         | <b>c.2860C&gt;T</b><br>c.539_541del        | 0.000748/<br>0.0000558  | Carriers            | 0.0326             | SH3TC2 | Charcot-Marie-Tooth Disease # 601596                            | AD /AR      |
|                                                         | 75         | 16          | F   | Demyelinating motor neuropathy                                                       | c.3325C>T<br>c.3325C>T                     | 0.0000398/<br>0.0000398 | Carriers            | 0.4640             |        |                                                                 |             |
|                                                         | 76         | 26          | F   | Peripheral axonal neuropathy<br>Scoliosis<br>Talipes cavus equinovarus               | <b>c.2860C&gt;T</b><br><b>c.2860C&gt;T</b> | 0.000748/<br>0.000748   | Carriers            | 0.8183             |        |                                                                 |             |
|                                                         | 77         | 6           | M   | Sensorimotor polyneuropathy<br>Psychomotor delay                                     | <b>c.2860C&gt;T</b><br>c.2640delC          | 0.000748/<br>-          | Carriers            | 0.4763             |        |                                                                 |             |
|                                                         | 78         | 49          | F   | Hammertoe<br>Talipes cavus equinovarus<br>Microcephaly<br>Gait imbalance<br>Deafness | c.3511C>T<br><b>c.2860C&gt;T</b>           | 0.00000796/<br>0.000748 | Carriers            | 0.6998             |        |                                                                 |             |
|                                                         | 79         | 51          | M   | Motor neuron atrophy<br>Parkinsonism<br>Frontotemporal Dementia                      | c.6477+4A>G<br>c.6477+4A>G                 | -/-                     | Carriers            | 0.0612             | SPG11  | Charcot-Marie-Tooth disease # 616668                            | AR          |
| Neuromuscular Junction Diseases<br>Ion Channel Diseases | 80         | 36          | M   | EMG: myotonic discharges                                                             | c.1261C>T                                  | 0.0000239               | De novo             | 0.5448             | CLCN1  | Myotonia congenita, atypical, acetazolamide-responsive # 608390 | AD          |
|                                                         | 81         | 24          | M   | Myotonia                                                                             | c.1214C>T                                  | -                       | Maternal (affected) | 0.0032             |        |                                                                 |             |
|                                                         | 82         | 15          | F   | Elevated serum creatine phosphokinase<br>Exercise intolerance<br>Myotonia            | c.313C>T<br>c.501C>G                       | 0.00035/<br>0.00117     | Carriers            | 0.0047             |        |                                                                 |             |
|                                                         | 83         | 6           | M   | Fatigable weakness<br>Muscle weakness<br>Respiratory insufficiency                   | c.583G>C<br>c.583G>C                       | -/-                     | Carriers            | 0.0055             | CHRNE  | Myasthenic syndrome, congenital, 4B, fast-channel #616324       | AR          |



|                                 | Patient ID | Age (years) | Sex | HPO                                           | Variants                                                         | GnomAD           | Family study | Phenomizer p-value | Gene    | Disorder MIM                                                   | Inheritance |
|---------------------------------|------------|-------------|-----|-----------------------------------------------|------------------------------------------------------------------|------------------|--------------|--------------------|---------|----------------------------------------------------------------|-------------|
| Neuromuscular Junction Diseases | 84         | 16          | F   | Muscular hypotonia                            | c.1150C>G<br>c.574G>C                                            | -/<br>0.00000398 | Carriers     | 0.9697             | DPAGT1  | Myasthenic syndrome, congenital # 614750                       | AR          |
|                                 | 85         | 4           | M   | Cold-sensitive myotonia                       | c.4774A>G                                                        | -                | De novo      | 0.4196             | SCN4A   | Myotonia congenita, atypical, acetazolamide-responsive #608390 | AD          |
|                                 | 86         | 58          | F   | Myopathy<br>Muscle cramps<br>Muscle stiffness | c.3877G>A                                                        | 0                | De novo      | 0.0566             |         | Myasthenic syndrome # 614198                                   |             |
| Motor Neuron Disease            | 87         | 13          | F   | Muscle weakness                               | g.(?_34635615)_1(34635855_?)de<br>g.(?_34635615)_1(34635855_?)de | -/-              | Carriers     | 0.7080             | SIGMAR1 | Spinal muscular atrophy # 605726                               | AR          |
|                                 | 88         | 37          | F   | Muscle weakness<br>Distal amyotrophy          | c.561_576del<br>g.(?_34635589)_1(34635880_?)de                   | -/-              | Carriers     | 0.5519             |         |                                                                |             |

F: female; M: male; AD: Autosomal dominant; AR: Autosomal recessive

**Supplementary Table S2.** Clinical data and genetic findings for patients with inconclusive diagnosis due to identification of heterozygous pathogenic / likely pathogenic variants in a recessive gene closely related to the patient's clinical phenotype, but a second variant was missing.

| Patient ID | Age (years) | Sex | HPO                                                                                                                                                                              | Variants              | GnomAD                 | Phenomizer p-value | Gene               | Disorder MIM                                   | Inheritance |
|------------|-------------|-----|----------------------------------------------------------------------------------------------------------------------------------------------------------------------------------|-----------------------|------------------------|--------------------|--------------------|------------------------------------------------|-------------|
| 90         | 56          | F   | Muscular dystrophy<br>Elevated serum creatine phosphokinase                                                                                                                      | c.2235+2T>G           | -                      | 0.1248             | ANO5               | Muscular dystrophy # 611307                    | AR          |
| 91         | 20          | M   | Myopathy<br>Elevated serum creatine phosphokinase                                                                                                                                | c.692G>T<br>c.1767C>A | 0.00103/<br>0.00000398 | 0.0469             | ANO5               | Muscular dystrophy # 611307                    | AR          |
| 92         | 2           | M   | Elevated serum creatine kinase<br>Delayed gross motor development                                                                                                                | c.2361_2362insTCAT    | -                      | 0.7971             | CAPN3              | Muscular dystrophy, limb-girdle # 618129       | AD /AR      |
| 93         | 52          | M   | Lower limb muscle weakness<br>Elevated serum creatine kinase<br>EMG: myopathic abnormalities<br>Lower limb muscle weakness<br>Muscular dystrophy<br>Pelvic girdle muscle atrophy | c.258G>C              | 0.00289                | 0.0004             | DAG1               | Muscular dystrophy-dystroglycanopathy # 613818 | AR          |
| 94         | 38          | M   | Metabolic myopathy                                                                                                                                                               | c.365C>T              | 0.0000518              | 0.5961             | PGAM2              | Glycogen storage disease X # 261670            | AR          |
| 95         | 37          | F   | Elevated serum creatine kinase<br>Cramps                                                                                                                                         | c.1094C>T             | 0.000711               | 0.0040             | PYGM               | McArdle disease # 232600                       | AR          |
| 96         | 43          | F   | Muscular hypotonia<br>Joint contractures                                                                                                                                         | c.264C>A              | 0.00156                | 0.5894             | RAPSN              | Myasthenic syndrome # 616326                   | AR          |
| 97         | 54          | M   | Muscle weakness<br>Spinal rigidity                                                                                                                                               | c.763C>T              | -                      | 0.5712             | SEPNI<br>(SELENON) | Muscular dystrophy # 602771                    | AR          |
| 98         | 70          | M   | Muscular dystrophy                                                                                                                                                               | c.409G>A              | 0.0000437              | 0.5575             | SGCA               | Muscular dystrophy, limb-girdle # 608099       | AR          |
| 99         | 16          | F   | Upper limb muscle weakness<br>Ulcerative colitis<br>Hearing impairment<br>Bulbar palsy<br>Polyneuropathy<br>Scoliosis                                                            | c.595delG             | -                      | 0.1296             | SLC52A2            | Brown-Vialetto-Van Laere syndrome # 614707     | AR          |

**Supplementary Table S3.** Clinical data and genetic findings for patients with inconclusive diagnosis.

| Patient ID                                    | Age (years) | Sex | Variants                                | Gene     | Disorder MIM                                                       | Inheritance |
|-----------------------------------------------|-------------|-----|-----------------------------------------|----------|--------------------------------------------------------------------|-------------|
| Possible cases of dual diagnosis              |             |     |                                         |          |                                                                    |             |
| 100                                           | 5           | F   | c.1287+5G>A<br>c.1287+5G>A              | TRAPPC11 | Muscular dystrophy, limb-girdle<br># 615356                        | AR          |
|                                               |             |     | c.1094C>T<br>c.1094C>T                  | PYGM     | McArdle disease<br># 232600                                        | AR          |
| 101                                           | 3           | M   | c.(3162+1_3163-1)<br>(4070+1_4071-1)dup | DMD      | Duchenne muscular dystrophy<br># 310200                            | AD / AR     |
|                                               |             |     | c.409G>A                                | MYH7     | Distal myopathy<br># 160500                                        |             |
| VUS identification and missing family studies |             |     |                                         |          |                                                                    |             |
| 102                                           | 57          | F   | c.11_15del                              | AARS1    | Charcot-Marie-Tooth disease, axonal, type 2N                       | AD          |
| 103                                           | 50          | M   | c.986G>A                                | AARS1    |                                                                    | AD          |
| 104                                           | 42          | F   | c.1574A>G                               | ATL1     | Neuropathy, hereditary sensory, type ID<br># 613708                | AD / AR     |
| 105                                           | 63          | F   | c.923C>A                                | BSCL2    | Neuropathy, distal hereditary motor, type VC<br># 619112           | AD / AR     |
| 106                                           | 50          | F   | c.1314G>C                               | CAPN3    | Muscular dystrophy, limb-girdle<br># 618129                        | AD / AR     |
| 107                                           | 62          | F   | c.526G>A                                | CHRNA1   | Myasthenic syndrome slowfast-channel<br># 601462                   | AD / AR     |
| 108                                           | -           | F   | c.309C>G                                | CHRNA1   | Myasthenic syndrome, congenital, 2A, slow-channel<br># 616313      | AD / AR     |
| 109                                           | 6           | M   | c.2234A>G                               | CLCN1    | Myotonia congenita, atypical, acetazolamide-responsive<br># 608390 | AD          |
| 110                                           | 38          | F   | c.804+1G>A                              | COL6A1   | Ullrich congenital muscular dystrophy<br>#254090                   | AD / AR     |
| 111                                           | 52          | M   | c.2966C>T                               | COL6A3   | Bethlem myopathy<br># 158810                                       | AD / AR     |
| 112                                           | 40          | F   | c.1360C>T                               | DES      | Myopathy, myofibrillar<br># 601419                                 | AD / AR     |
| 113                                           | -           | M   | c.822A>G<br>c.4777A>C                   | DST      | Neuropathy, hereditary sensory and autonomic, type VI<br># 614653  | AR          |
| 114                                           | 65          | M   | c.887C>T                                | FLNC     | Cardiomyopathy familial hypertrophic                               | AD          |

| # 617047 |    |   |                                |                 |                                                            |         |
|----------|----|---|--------------------------------|-----------------|------------------------------------------------------------|---------|
| 115      | 6  | F | c.487C>T                       | <i>GDAP1</i>    | Charcot-Marie-Tooth disease<br># 607831                    | AD / AR |
| 116      | 38 | F | c.677_679del                   |                 |                                                            |         |
| 117      | 49 | M | c.20C>T                        | <i>HSPB1</i>    | Charcot-Marie-Tooth disease<br># 606595                    | AD      |
| 118      | 17 | M | c.244G>A                       | <i>KBTBD13</i>  | Nemaline myopathy<br># 609273                              | AD      |
| 119      | 3  | M | c.4205G>A                      | <i>MYH2</i>     | Proximal myopathy and ophthalmoplegia<br># 605637          | AD / AR |
| 120      | 52 | M | c.4205G>A                      |                 |                                                            |         |
| 121      | 56 | M | c.3127T>G                      |                 |                                                            |         |
| 122      | -  | M | c.4421C>A                      | <i>MYH7</i>     | Distal myopathy<br># 160500                                | AD      |
| 123      | -  | F | c.349G>C                       | <i>REEP1</i>    | Neuronopathy, distal hereditary motor, type VB<br># 614751 | AD      |
| 124      | 15 | M | c.164C>T                       |                 |                                                            |         |
| 125      | 48 | M | c.12861_12869del<br>c.12956G>A | <i>RYR1</i>     | Central core disease<br># 117000                           | AD / AR |
| 126      | 73 | M | c.505T>C                       | <i>SH3TC2</i>   | Charcot-Marie-Tooth Disease<br># 601596                    | AD / AR |
| 127      | 44 | F | c.1607G>A<br>c.1177+15T>C      |                 |                                                            |         |
| 128      | 19 | M | c.247G>T                       | <i>STIM1</i>    | Myopathy, tubular aggregate<br># 160565                    | AD / AR |
| 129      | 1  | M | C.1568-1G>A<br>c.2147C>G       | <i>TRAPPC11</i> | Muscular dystrophy, limb-girdle<br># 615356                | AR      |
| 130      | 50 | M | c.91615_91616dup               | <i>TTN</i>      | Muscular dystrophy, limb-girdle<br>#608807                 | AD / AR |



[illegible]

[illegible]

[illegible]







[illegible]

| Gen                   | Variant                                  | ACMG | Very Strong | Strong |     |     |     | Moderate |     |     |     |     |     | Supporting |     |     |     |     |
|-----------------------|------------------------------------------|------|-------------|--------|-----|-----|-----|----------|-----|-----|-----|-----|-----|------------|-----|-----|-----|-----|
|                       |                                          |      | PVS1        | PS1    | PS2 | PS3 | PS4 | PM1      | PM2 | PM3 | PM4 | PM5 | PM6 | PP1        | PP2 | PP3 | PP4 | PP5 |
| TTN<br>NM_001267550.2 | c.38661_38665del<br>p.12885_12887del     | P    |             |        |     |     |     |          |     |     |     |     |     |            |     |     |     |     |
|                       | c.3034C>T<br>p.Arg1012*                  | LP   |             |        |     |     |     |          |     |     |     |     |     |            |     |     |     |     |
|                       | c.106531+1G>A                            | P    |             |        |     |     |     |          |     |     |     |     |     |            |     |     |     |     |
|                       | c.33064C>T<br>p.Arg11022*                | LP   |             |        |     |     |     |          |     |     |     |     |     |            |     |     |     |     |
|                       | c.102941G>A<br>p.Gly34314Asp             | LP * |             |        |     |     |     |          |     |     |     |     |     |            |     |     |     |     |
|                       | c.102966del<br>p.Lys34322AsnfsTer9       | LP   |             |        |     |     |     |          |     |     |     |     |     |            |     |     |     |     |
|                       | c.91615_91616dup<br>p.Gly30541ProfsTer19 | P    |             |        |     |     |     |          |     |     |     |     |     |            |     |     |     |     |
|                       | c.38737G>T<br>p.Glu12913*                | P    |             |        |     |     |     |          |     |     |     |     |     |            |     |     |     |     |
|                       | c.87019_87022del<br>p.29007_29008del     | P    |             |        |     |     |     |          |     |     |     |     |     |            |     |     |     |     |
|                       | c.86992_86994delCTG<br>insGTCTGTCAT      | LP   |             |        |     |     |     |          |     |     |     |     |     |            |     |     |     |     |
|                       | p.Leu28998delinsValCysHis                |      |             |        |     |     |     |          |     |     |     |     |     |            |     |     |     |     |

\*Variant pathogenicity classification according PM3 (For recessive disorders, detected in trans with a pathogenic variant (Pathogenic, Moderate))
